# Supplementary material for: Clinicopathological and prognostic significance of Fusobacterium nucleatum infection in colorectal cancer: a meta-analysis
Source: PubMed Central journal article supplement (PMC7890333; doi:10.7150/jca.50111), 2021-01-15
Supplement: jcav12p1583s1.pdf [file jcav12p1583s1.pdf]

## Supplementary Material:

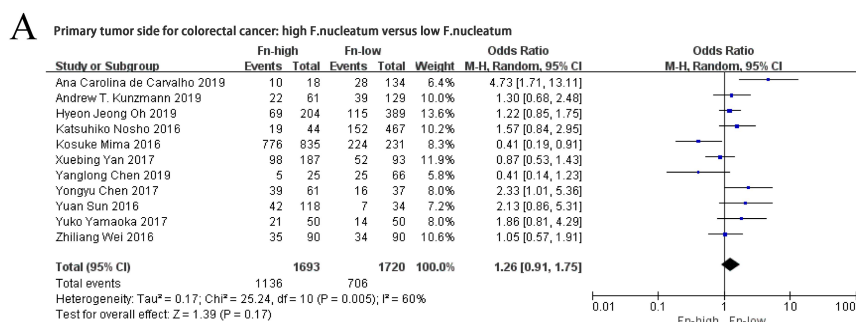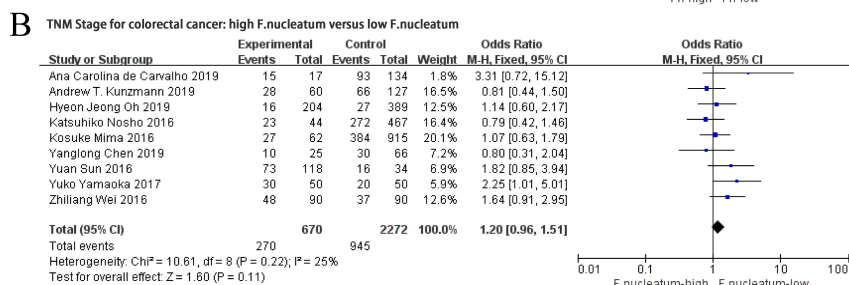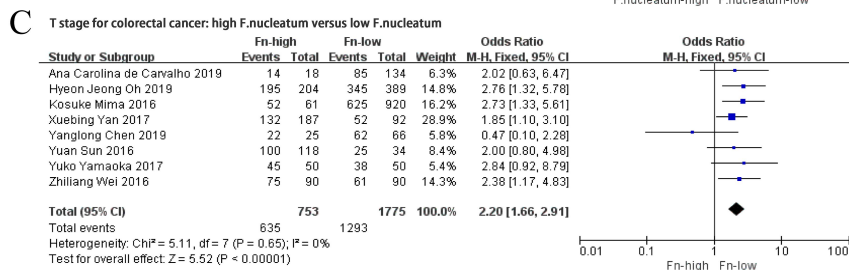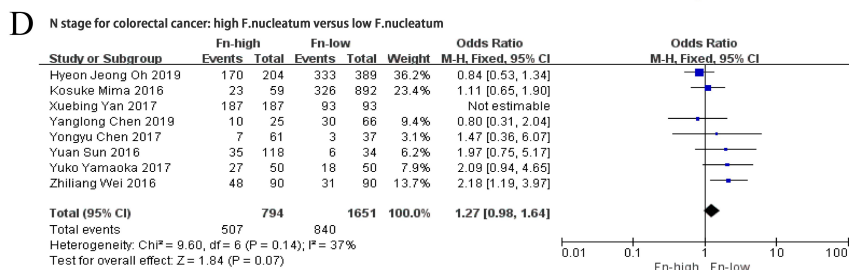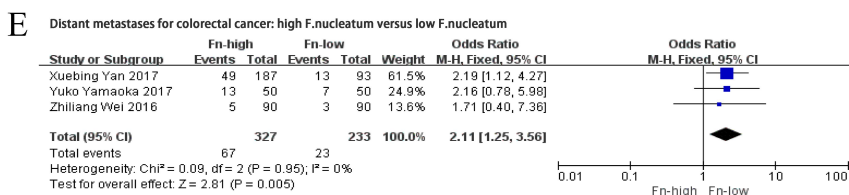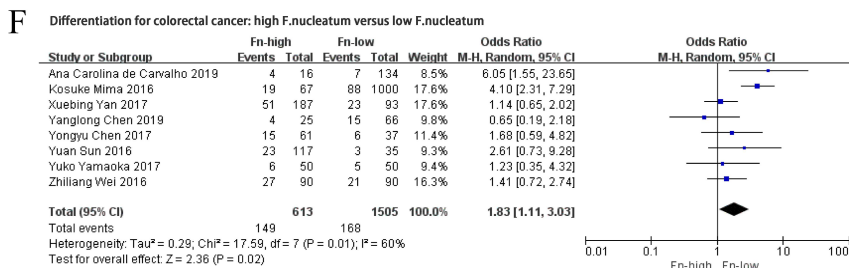

S1. Forest plot of association between F.nucleatum level with clinicopathological characteristics: a. primary tumor site b. TNM Stage c. T stage d. N stage e. distant metastases f. differentiation

**A** MSI for colorectal cancer: high F.nucleatum versus low F.nucleatum

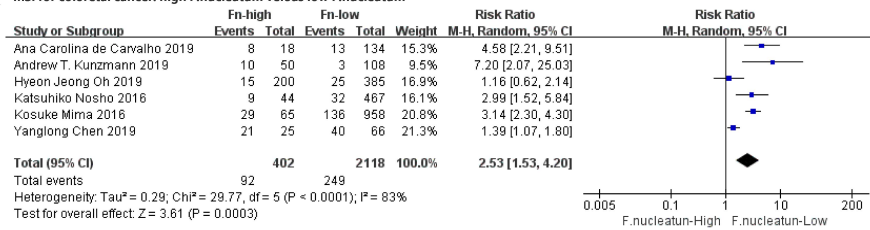

**B** KRAS for colorectal cancer: high F.nucleatum versus low F.nucleum

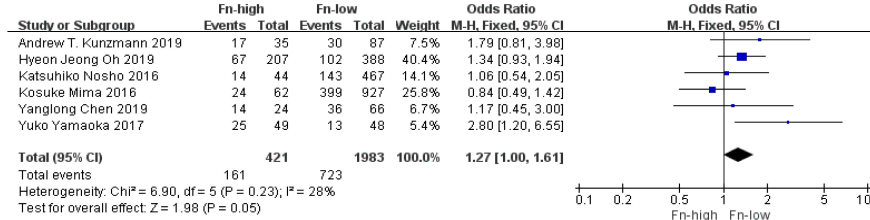

**C** BRAF for colorectal cancer: high F.nucleatum versus low F.nucleum

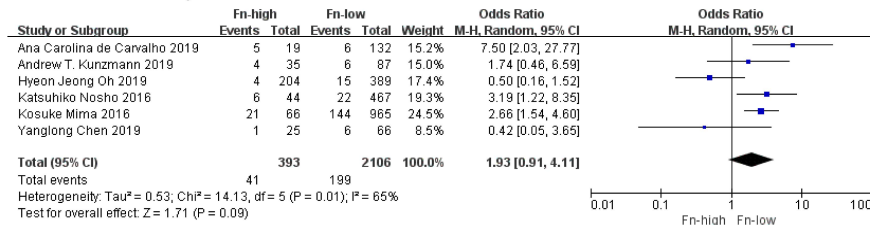

**D** MLH1 for colorectal cancer: high F.nucleatum versus low F.nucleum

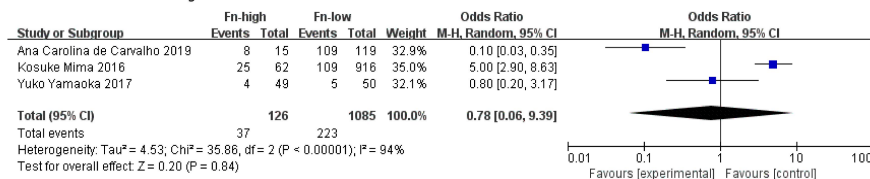

**E** MLH1 for colorectal cancer: high F.nucleatum versus low F.nucleum

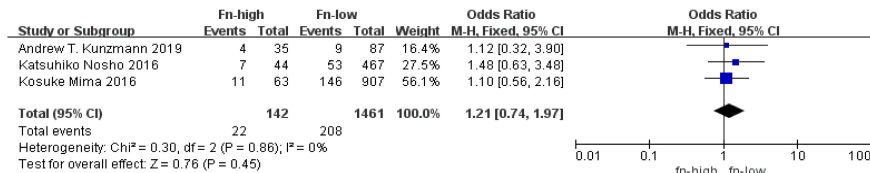

S2. Forest plot of association between F.nucleatum level with molecular characteristics:  
a. MSI b. KRAS c. BRAF e. MLH1 f. PIK2CA
